# Supplementary material
Source: MDPI journal article supplement (https://www.mdpi.com/2673-9992/15/1/7)
Supplement: s1 [file s1]

## REPORT ON THE PRE AND POST ASSESSMENT RESULTS FOR ENTEBBE AND KATABI COMMUNITY HEALTH WORKERS TRAINING

### 1. Are you involved in Integrated Community Case Management of childhood illnesses?

|     | Pre-assessment    |                | Post-assessment   |                |
|-----|-------------------|----------------|-------------------|----------------|
|     | Frequency (n=151) | Percentage (%) | Frequency (n=151) | Percentage (%) |
| Yes | 88                | 58.3           | 90                | 59.6           |
| No  | 63                | 41.7           | 61                | 40.4           |

### 2. Gender

|        | Pre-assessment    |                | Post-assessment   |                |
|--------|-------------------|----------------|-------------------|----------------|
|        | Frequency (n=151) | Percentage (%) | Frequency (n=151) | Percentage (%) |
| Female | 126               | 83.4           | 127               | 84.1           |
| Male   | 25                | 16.6           | 24                | 15.9           |

### 3. Did you know that microbes/ germs can fail to respond to antimicrobials / medicine? \*\*

|     | Pre-assessment    |                | Post-assessment   |                |
|-----|-------------------|----------------|-------------------|----------------|
|     | Frequency (n=151) | Percentage (%) | Frequency (n=151) | Percentage (%) |
| Yes | 75                | 49.7           | 149               | 98.7           |
| No  | 76                | 50.3           | 2                 | 1.3            |

#### 3.1. By Gender

|     | Pre-assessment |    |                   |                | Post-assessment |     |                   |                |
|-----|----------------|----|-------------------|----------------|-----------------|-----|-------------------|----------------|
|     | Gender         |    | Frequency (n=151) | Percentage (%) | Gender          |     | Frequency (n=151) | Percentage (%) |
| Yes | M              | 19 | 75                | 49.7           | M               | 25  | 149               | 98.7           |
|     | F              | 56 |                   |                | F               | 124 |                   |                |
| No  | M              | 6  | 76                | 50.3           | M               | 0   | 2                 | 1.3            |
|     | F              | 70 |                   |                | F               | 2   |                   |                |

### 4. Is it important to complete the antimicrobial dose?

|     | Pre-assessment    |                | Post-assessment   |                |
|-----|-------------------|----------------|-------------------|----------------|
|     | Frequency (n=151) | Percentage (%) | Frequency (n=151) | Percentage (%) |
| Yes | 151               | 100.0          | 151               | 100.0          |
| No  | 0                 | 0.0            | 0                 | 0.0            |

**5. Microbes can be resistant towards medicine in humans if antimicrobials are used incorrectly in livestock.**

|               | Pre-assessment    |                | Post-assessment   |                |
|---------------|-------------------|----------------|-------------------|----------------|
|               | Frequency (n=151) | Percentage (%) | Frequency (n=151) | Percentage (%) |
| True          | 69                | 45.7           | 150               | 99.3           |
| False         | 67                | 44.4           | 1                 | 0.7            |
| I do not know | 15                | 9.9            | 0                 | 0.0            |

**6. Microbes can be resistant towards medicine if antimicrobials are dumped in the environment.**

|               | Pre-assessment    |                | Post-assessment   |                |
|---------------|-------------------|----------------|-------------------|----------------|
|               | Frequency (n=151) | Percentage (%) | Frequency (n=151) | Percentage (%) |
| True          | 50                | 33.1           | 146               | 96.7           |
| False         | 85                | 56.3           | 3                 | 2.0            |
| I do not know | 16                | 10.6           | 2                 | 1.3            |

**7. Hand hygiene and sanitation in our homes and communities can help support the antimicrobials/medicine to effectively kill the microbes/germs.**

|          | Pre-assessment    |                | Post-assessment   |                |
|----------|-------------------|----------------|-------------------|----------------|
|          | Frequency (n=151) | Percentage (%) | Frequency (n=151) | Percentage (%) |
| Agree    | 141               | 93.4           | 151               | 100.0          |
| Disagree | 10                | 6.6            | 0                 | 0              |

**8. It is not very important to test for an infection before a patient takes medicine**

|          | Pre-assessment    |                | Post-assessment   |                |
|----------|-------------------|----------------|-------------------|----------------|
|          | Frequency (n=151) | Percentage (%) | Frequency (n=151) | Percentage (%) |
| Agree    | 88                | 58.3           | 67                | 44.4           |
| Disagree | 62                | 41.1           | 84                | 55.6           |

**9. Medicine may fail to kill the microbes because of continued self-medication within our communities.**

|               | Pre-assessment    |                | Post-assessment   |                |
|---------------|-------------------|----------------|-------------------|----------------|
|               | Frequency (n=151) | Percentage (%) | Frequency (n=151) | Percentage (%) |
| Agree         | 128               | 84.8           | 151               | 100.0          |
| Disagree      | 20                | 13.2           | 0                 | 0.0            |
| I do not know | 3                 | 2.0            | 0                 | 0.0            |

**10. I feel I am knowledgeable enough to educate my community about proper use of medicine.**

|               | Pre-assessment       |                | Post-assessment      |                |
|---------------|----------------------|----------------|----------------------|----------------|
|               | Frequency<br>(n=151) | Percentage (%) | Frequency<br>(n=151) | Percentage (%) |
| Agree         | 54                   | 35.8           | 151                  | 100.0          |
| Disagree      | 90                   | 59.6           | 0                    | 0.0            |
| I do not know | 7                    | 4.6            | 0                    | 0.0            |

**11. Do you have any disability?**

|     | Pre-assessment       |                |
|-----|----------------------|----------------|
|     | Frequency<br>(n=151) | Percentage (%) |
| Yes | 4                    | 2.6            |
| No  | 147                  | 97.4           |

**12. Are you aware of the importance of Gender Equality and Social Inclusion? (Among CHWs from Entebbe Municipality)**

|          | Pre-assessment      |                | Post-assessment     |                |
|----------|---------------------|----------------|---------------------|----------------|
|          | Frequency<br>(n=70) | Percentage (%) | Frequency<br>(n=70) | Percentage (%) |
| Yes      | 20                  | 28.6           | 67                  | 97.1           |
| Not sure | 15                  | 21.4           | 3                   | 2.9            |
| No       | 35                  | 50.0           | 0                   | 0.0            |

**13. Would you recommend this training to other VHTs?**

|     | Post-assessment      |                |
|-----|----------------------|----------------|
|     | Frequency<br>(n=151) | Percentage (%) |
| Yes | 151                  | 100.0          |

**\*\*Response to % of the trained health practitioners and CHWs demonstrating improved knowledge on AMS/AMR/IPC after training.**
