# Supplementary material
Source: MDPI journal article supplement (https://www.mdpi.com/2673-9992/15/1/7)
Supplement: s1 [file s1]

**A REPORT FOR THE PRE AND POST ASSESSMENT OF A TWO-DAY WORKSHOP ON AMR,  
AMS AND IPC AMONG COMMUNITY PHARMACY STAFF, LOWER-LEVEL FACILITY HEALTH  
PRACTITIONERS, AND VETERINARY WORKERS**

**SECTION A: Demographics**

|                                   | <b>Frequency (Percentage)</b> |                            |
|-----------------------------------|-------------------------------|----------------------------|
| <b>HIGHEST LEVEL OF EDUCATION</b> | <b>PRE<br/>N = 52(%)</b>      | <b>POST<br/>N = 52 (%)</b> |
| Secondary                         | 1 (1.9)                       | 1 (1.9)                    |
| Certificate                       | 8 (15.4)                      | 8 (15.4)                   |
| Diploma                           | 22 (42.3)                     | 22 (42.3)                  |
| Bachelors                         | 16 (30.8)                     | 16 (30.8)                  |
| Master's degree                   | 3 (5.8)                       | 3 (5.8)                    |
| Other :                           |                               |                            |
| Post graduate diploma             | 1 (1.9)                       | 1 (1.9)                    |
| PhD                               | 1 (1.9)                       | 1 (1.9)                    |
|                                   |                               |                            |
| <b>GENDER</b>                     |                               |                            |
| Male                              | 26 (50)                       | 26 (50)                    |
| Female                            | 26 (50)                       | 26 (50)                    |
|                                   |                               |                            |
| <b>CADRE</b>                      |                               |                            |
| Pharmacist                        | 11 (21.15)                    | 11 (21.2)                  |
| Pharmacy technician               | 5 (9.6)                       | 5 (9.6)                    |
| Nurse / Enrolled Nurse            | 9 (17.3)                      | 9 (17.3)                   |
| Laboratory staff / Technician     | 1 (1.)                        | 1 (1.9)                    |
| Medical / Clinical officer        | 5 (9.6)                       | 5 (9.6)                    |
| Midwife                           | 3 (5.8)                       | 3 (5.8)                    |
| Private veterinary officer        | 10 (19.2)                     | 10 (19.2)                  |
| Government Veterinary officer     | 4 (7.7)                       | 4 (7.7)                    |
| <b>Other</b>                      |                               |                            |
| Nursing assistant                 | 1 (1.9)                       | 1 (1.9)                    |
| Orthopedic officer                | 1 (1.9)                       | 1 (1.9)                    |
| Farmer                            | 1 (1.9)                       | 1 (1.9)                    |

|                                         |           |           |
|-----------------------------------------|-----------|-----------|
| Internal mentor                         | 1(1.9)    | 1(1.9)    |
|                                         |           |           |
| <b>NATURE OF FACILITY</b>               |           |           |
| Health centre                           | 12 (23.1) | 12 (23.1) |
| Government Veterinary care centre       | 5 (9.6)   | 5 (9.6)   |
| Private (community) veterinary practice | 5 (9.6)   | 5 (9.6)   |
| Private (community) pharmacy            | 23 (44.2) | 23 (44.2) |
| Human health drug shop                  | 0 (0)     | 0 (0)     |
| Animal health drug shop                 | 4 (7.7)   | 4 (7.7)   |
| Veterinary pharmacy                     | 0 (0)     | 0 (0)     |
| <b>Other</b>                            |           |           |
| Hospital (NGO)                          | 1 (1.9)   | 1(1.9)    |
| Mixed farm                              | 1 (1.9)   | 1 (1.9)   |
| Research and bioethics firm             | 1 (1.9)   | 1 (1.9)   |
|                                         |           |           |
| <b>ROLE / RESPONSIBILITY</b>            |           |           |
| Prescribing antibiotics                 | 21 (40.4) | 21 (40.4) |
| Administering antibiotics               | 24 (46.1) | 24 (46.2) |
| Supplying antibiotics                   | 13 (25)   | 13 (25)   |
| Dispensing antibiotics                  | 31 (59.6) | 31 (59.6) |
| Procuring / purchasing antibiotics      | 18 (34.6) | 18 (34.6) |

## **SECTION TWO**

| *Antibiotics are effective against?    | Responses | Frequency (Percentage) |                    |
|----------------------------------------|-----------|------------------------|--------------------|
|                                        |           | PRE<br>N = 52 (%)      | POST<br>N = 52 (%) |
| <i>Correct response: BACTERIA only</i> | Bacteria  | 41 (78.8)              | 52 (100)           |
|                                        | Viruses   | 12 (23.1)              | 3 (5.8)            |
|                                        | Fungi     | 9 (17.3)               | 0 (0)              |
|                                        | Parasites | 7 (13.5)               | 0 (0)              |

\*Antibiotics are effective against

| Count of 1_GENDER                  | Column Labels |                   |             |
|------------------------------------|---------------|-------------------|-------------|
| Row Labels                         | Bacteria      | Bacteria, VIRUSES | Grand Total |
| clinical medical officer/physician | 6             |                   | 6           |
| FEMALE                             | 2             |                   | 2           |
| MALE                               | 4             |                   | 4           |
| Lab technologist                   | 1             |                   | 1           |
| MALE                               | 1             |                   | 1           |
| Mid wife                           | 3             |                   | 3           |
| FEMALE                             | 3             |                   | 3           |
| nurse                              | 11            |                   | 11          |
| FEMALE                             | 9             |                   | 9           |
| MALE                               | 2             |                   | 2           |
| orthopaedic officer (other)        | 1             |                   | 1           |
| MALE                               | 1             |                   | 1           |
| Pharmacist                         | 11            |                   | 11          |
| FEMALE                             | 3             |                   | 3           |
| MALE                               | 8             |                   | 8           |
| Pharmacy technician                | 5             |                   | 5           |
| FEMALE                             | 3             |                   | 3           |
| MALE                               | 2             |                   | 2           |
| Veterinary officer (other)         | 11            | 3                 | 14          |
| FEMALE                             | 6             | 1                 | 7           |
| MALE                               | 5             | 2                 | 7           |
| Grand Total                        | 49            | 3                 | 52          |

| Which of the following can become resistant to antimicrobials? (MCQ) | Responses | Frequency ( Percentage) |                   |
|----------------------------------------------------------------------|-----------|-------------------------|-------------------|
|                                                                      |           | PRE<br>N = 52 (%)       | POST<br>N = 52(%) |
|                                                                      | Bacteria  | 51 (98.1)               | 52 (100)          |
|                                                                      | Viruses   | 50 (96.1)               | 52 (100)          |
|                                                                      | Fungi     | 42 (80.8)               | 50 (96.1)         |
|                                                                      | Parasites | 35 (67.3)               | 49 (94.2)         |
|                                                                      | Humans    | 15 (28.8)               | 0 (0)             |
|                                                                      | Animals   | 27 (59.9)               | 2 (3.8)           |

| What are the causes of antimicrobial resistance?<br>(multiple choice question) | Responses                         | Frequency (Percentage) |                    |
|--------------------------------------------------------------------------------|-----------------------------------|------------------------|--------------------|
|                                                                                |                                   | PRE<br>N = 52 (%)      | POST<br>N = 52 (%) |
|                                                                                | Poor infection prevention control | 41 (78.8)              | 51 (98.1)          |
|                                                                                | Inadequate hand hygiene           | 32 (61.5)              | 50 (96.1)          |
|                                                                                | Use of antibiotics                | 12 (23.1)              | 52 (100)           |
|                                                                                | Overuse of antibiotics            | 48 (92.3)              | 52 (100)           |

| Choose WHO's most preferred category aimed at optimizing use of antibiotics and minimizing their resistance (MOST PREFERRED OPTION FIRST)? | Responses                 | Frequency (Percentage) |                    |
|--------------------------------------------------------------------------------------------------------------------------------------------|---------------------------|------------------------|--------------------|
|                                                                                                                                            |                           | PRE<br>N = 52(%)       | POST<br>N = 52 (%) |
|                                                                                                                                            | Access, Reserve and Watch | 20 (38.5)              | 2 (3.8)            |
|                                                                                                                                            | Access, Watch and Reserve | 22 (42.3)              | 50 (96.1)          |
|                                                                                                                                            | Reserve, Watch and Access | 10 (19.2)              | 0 (0)              |

| What is the main disadvantage of using syndromic management as it related to AMR? | Responses                                                                                   | Frequency (Percentage) |                   |
|-----------------------------------------------------------------------------------|---------------------------------------------------------------------------------------------|------------------------|-------------------|
|                                                                                   |                                                                                             | PRE<br>N = 52(%)       | POST<br>N = 52(%) |
|                                                                                   | Many patients may receive antimicrobials unnecessarily in the absence of proper diagnostics | 25 (48.1)              | 47 (90.4)         |

|  |                                                              |           |         |
|--|--------------------------------------------------------------|-----------|---------|
|  | Too many diagnostics are used before prescribing a treatment | 4 (7.7)   | 3 (5.8) |
|  | Treatment is significantly delayed for patients              | 20 (38.5) | 2 (3.8) |
|  | All the above                                                | 3 (5.8)   | 0 (0)   |

| Please give your opinion on the statements below                                                          | Responses | Frequency (Percentage) |                   |
|-----------------------------------------------------------------------------------------------------------|-----------|------------------------|-------------------|
|                                                                                                           |           | PRE<br>N = 52(%)       | POST<br>N = 52(%) |
| Microbes / germs can fail to respond to antimicrobials/ medicine.                                         | YES       | 49 (94.2)              | 52 (100)          |
|                                                                                                           | NO        | 3 (5.8)                | 0 (0)             |
| Microbes can be resistant towards medicine in humans if antimicrobials are used incorrectly in livestock. | YES       | 45 (86.5)              | 51 (98.1)         |
|                                                                                                           | NO        | 7 (13.5)               | 1 (1.9)           |
| Microbes can be resistant towards medicine if antimicrobials are dumped in the environment                | YES       | 25 (48.1)              | 48 (92.3)         |
|                                                                                                           | NO        | 27 (51.9)              | 4 (7.7)           |

| Please indicate how much you agree with the following view points                                                                                    | Responses | Frequency (Percentage) |                   |
|------------------------------------------------------------------------------------------------------------------------------------------------------|-----------|------------------------|-------------------|
|                                                                                                                                                      |           | PRE<br>N = 52(%)       | POST<br>N = 52(%) |
| **Hand hygiene and sanitation in our homes and communities can help support the antimicrobials / medicines to effectively kill the microbes / germs. | AGREE     | 32 (61.5)              | 52 (100)          |
|                                                                                                                                                      | DISAGREE  | 20 (38.5)              | 0 (0)             |
| It is NOT very important to test for an infection before a patient takes medicine                                                                    | AGREE     | 5 (9.6)                | 1 (1.9)           |
|                                                                                                                                                      | DISAGREE  | 47 (90.4)              | 51 (98.1)         |
|                                                                                                                                                      | AGREE     | 29 (55.8)              | 43 (82.7)         |

|                                                                                                     |          |           |           |
|-----------------------------------------------------------------------------------------------------|----------|-----------|-----------|
| Microbes can be resistant towards medicine if antimicrobials are dumped in the environment          | DISAGREE | 23 (44.2) | 9 (17.3)  |
| Medicine may fail to kill the microbes because of continued self-medication within our communities. | AGREE    | 42 (80.8) | 50 (96.1) |
|                                                                                                     | DIASGREE | 10 (19.3) | 2 (3.8)   |
| I feel I am knowledgeable enough to educate my community about proper use of medicine.              | AGREE    | 35 (67.3) | 52 (100)  |
|                                                                                                     | DISAGREE | 17 (32.7) | 0 (0)     |

| Please indicate how much you agree with the following view points                     | Responses | FREQUENCY (PERCENTAGE) |                    |
|---------------------------------------------------------------------------------------|-----------|------------------------|--------------------|
|                                                                                       |           | PRE<br>N = 52(%)       | POST<br>N = 52 (%) |
| Antimicrobial resistance is an important issue in my daily practice                   | AGREE     | 46 (88.5)              | 52 (100)           |
|                                                                                       | DISAGREE  | 6 (11.5)               | 0 (0)              |
| Prescribing guidelines will be / are easy to implement in my workplace                | AGREE     | 44 (84.6)              | 45 (86.5)          |
|                                                                                       | DISAGREE  | 8 (15.9)               | 7 (13.5)           |
| I feel motivated to advocate for the fight against antimicrobial resistance           | AGREE     | 39 (75)                | 49 (94.2)          |
|                                                                                       | DISAGREE  | 13 (25)                | 3 (5.8)            |
| Patients and the public will take antibiotics inappropriately regardless of what I do | AGREE     | 27(51.9)               | 9 (17.3)           |
|                                                                                       | NOT SURE  | 15 (28.9)              | 3 (5.8)            |
|                                                                                       | DIASGREE  | 10 (19.2)              | 40 (76.9)          |
| My actions can protect the effectiveness of antimicrobials and prevent resistance     | AGREE     | 30(57.7)               | 50 (96.1)          |
|                                                                                       | NOT SURE  | 6 (11.5)               | 2 (3.8)            |

|                                                                                                                                                             |          |           |           |
|-------------------------------------------------------------------------------------------------------------------------------------------------------------|----------|-----------|-----------|
|                                                                                                                                                             | DISAGREE | 16 (30.8) | 0 (0)     |
| **By practicing good hand hygiene / handwashing, I can support efforts to prevent the spread of infections and antibiotic resistance as a healthcare worker | AGREE    | 27 (51.9) | 48 (92.3) |
|                                                                                                                                                             | NOT SURE | 15 (28.8) | 2 (3.8)   |
|                                                                                                                                                             | DISAGREE | 10 (19.2) | 2 (3.8)   |
| When I identify inappropriate antibiotic prescribing, I feel confident to challenge it with colleagues                                                      | AGREE    | 24 (46.1) | 50 (96.1) |
|                                                                                                                                                             | NOT SURE | 17 (32.7) | 2 (3.8)   |
|                                                                                                                                                             | DISAGREE | 11 (21.2) | 0 (0)     |
| It is important I give advice to patients / public about antibiotic resistance                                                                              | AGREE    | 45 (86.5) | 52 (100)  |
|                                                                                                                                                             | NOT SURE | 7 (13.5)  | 0 (0)     |
|                                                                                                                                                             | DISAGREE | 0 (0)     | 0 (0)     |
| I worry about the quality of antibiotic formulations available for me to supply to patients and the impact this has on patient care                         | AGREE    | 29 (55.8) | 49 (94.2) |
|                                                                                                                                                             | NOT SURE | 13 (25)   | 3 (5.8)   |
|                                                                                                                                                             | DISAGREE | 10 (19.2) | 0 (0)     |
| Antimicrobial resistance has negative impacts on my patients                                                                                                | AGREE    | 45 (86.5) | 52 (100)  |
|                                                                                                                                                             | NOT SURE | 7 (13.3)  | 0 (0)     |
|                                                                                                                                                             | DISAGREE | 0 (0)     | 0 (0)     |

\*\* By practicing good hand hygiene / handwashing, I can support efforts to prevent the spread of infections and antibiotic resistance as a healthcare worker

| Count of<br>44_post_By_practicin | Column Labels |      |             |
|----------------------------------|---------------|------|-------------|
| Row Labels                       | FEMALE        | MALE | Grand Total |
| clinical medical officer         | 2             | 4    | 6           |
| AGREE                            | 2             | 4    | 6           |
| Lab technologist                 |               | 1    | 1           |
| AGREE                            |               | 1    | 1           |

|                            |           |           |           |
|----------------------------|-----------|-----------|-----------|
| <b>Mid wife</b>            | <b>3</b>  |           | <b>3</b>  |
| AGREE                      | 3         |           | 3         |
| <b>nurse</b>               | <b>9</b>  | <b>2</b>  | <b>11</b> |
| AGREE                      | 8         | 2         | 10        |
| DISAGREE                   | 1         |           | 1         |
| <b>orthopaedic officer</b> |           | <b>1</b>  | <b>1</b>  |
| AGREE                      |           | 1         | 1         |
| <b>Pharmacist</b>          | <b>3</b>  | <b>8</b>  | <b>11</b> |
| AGREE                      | 3         | 7         | 10        |
| DISAGREE                   |           | 1         | 1         |
| <b>Pharmacy technician</b> | <b>3</b>  | <b>2</b>  | <b>5</b>  |
| AGREE                      | 2         | 2         | 4         |
| NOT SURE                   | 1         |           | 1         |
| <b>Veterinary officer</b>  | <b>7</b>  | <b>7</b>  | <b>14</b> |
| AGREE                      | 7         | 6         | 13        |
| NOT SURE                   |           | 1         | 1         |
| <b>Grand Total</b>         | <b>27</b> | <b>25</b> | <b>52</b> |

| ***At what level(s) do you think it is most effective to tackle resistance to antibiotics? (MCQ) | Response                                            | Frequency (Percentage) |                   |
|--------------------------------------------------------------------------------------------------|-----------------------------------------------------|------------------------|-------------------|
|                                                                                                  |                                                     | PRE<br>N = 52(%)       | POST<br>N = 52(%) |
|                                                                                                  | The public                                          | 41 (78.8)              | 45 (86.5)         |
|                                                                                                  | Only prescribers                                    | 22 (42.3)              | 50 (96.1)         |
|                                                                                                  | All health care workers                             | 50 (96.1)              | 52 (100)          |
|                                                                                                  | Environmental health / animal health / human health | 39 (75)                | 45 (86.5)         |
|                                                                                                  | ***Action at all levels                             | 51 (98.1)              | 52 (100)          |
| Have you heard of World Antimicrobial Awareness Week (WAAW)?                                     | Response                                            | Frequency (Percentage) |                   |
|                                                                                                  |                                                     | PRE<br>N = 52(%)       | POST<br>N = 52(%) |
|                                                                                                  | YES                                                 | 25 (48.1)              | 52 (100)          |
|                                                                                                  | NO                                                  | 27 (51.9)              | 0 (0)             |



### SECTION THREE: FEEDBACK ON THE WORKSHOP.

| What is your overall assessment of the workshop? (1 = insufficient, 5 = excellent) | Frequency<br>N = 52 | Percentage (%) |
|------------------------------------------------------------------------------------|---------------------|----------------|
| 1                                                                                  | 0                   | 0              |
| 2                                                                                  | 0                   | 0              |
| 3                                                                                  | 2                   | 3.8            |
| 4                                                                                  | 10                  | 19.2           |
| 5                                                                                  | 40                  | 76.9           |

| Which session of the workshop did you find most interesting or useful? | Frequency<br>(N = 52) | Percentage (%) |
|------------------------------------------------------------------------|-----------------------|----------------|
| All sessions                                                           | 15                    | 28.8           |
| Case studies                                                           | 8                     | 15.4           |
| Interventions to combat AMR                                            | 4                     | 7.7            |
| Hand hygiene in relation to AMR                                        | 10                    | 19.2           |
| Differential diagnosis                                                 | 3                     | 5.8            |
| Quiz sessions                                                          | 2                     | 3.8            |
| One Health and AMR                                                     | 10                    | 19.2           |

| Did the workshop achieve the objectives? | Frequency<br>(N = 52) | Percentage (%) |
|------------------------------------------|-----------------------|----------------|
| YES                                      | 52                    | 100            |
| NO                                       | 0                     | 0              |

| <b>Knowledge and information gained from participation at this workshop</b> |                   | <b>Frequency<br/>(N = 52)</b> | <b>Percentage<br/>(%)</b> |
|-----------------------------------------------------------------------------|-------------------|-------------------------------|---------------------------|
| <b>Met your expectations?</b>                                               | <b>YES</b>        | <b>49</b>                     | <b>94.2</b>               |
|                                                                             | NO                | 0                             | 0                         |
|                                                                             | SOMEWHAT          | 3                             | 5.8                       |
| <b>Will be useful/applicable in your work?</b>                              | <b>DEFINITELY</b> | <b>52</b>                     | <b>100</b>                |
|                                                                             | SOMEWHAT          | 0                             | 0                         |
|                                                                             | NOT AT ALL        | 0                             | 0                         |

| <b>How do you think the workshop could have been made more effective?</b>                    | <b>Frequency<br/>(N= 52)</b> | <b>Percentage<br/>(%)</b> |
|----------------------------------------------------------------------------------------------|------------------------------|---------------------------|
| Presence of facilitators from Ministry of Health                                             | 5                            | 9.6                       |
| The online/ UK facilitators should speak slowly in order for the audience to follow properly | 10                           | 19.2                      |
| Increase transport refund                                                                    | 3                            | 5.8                       |
| <b>Extension to other districts, municipalities and regions</b>                              | <b>32</b>                    | <b>61.5</b>               |

| <b>Please comment on the organization of the workshop<br/>(1 = insufficient; 5 = excellent)</b> | <b>Frequency<br/>(N = 52)</b> | <b>Percentage<br/>(%)</b> |
|-------------------------------------------------------------------------------------------------|-------------------------------|---------------------------|
| 1                                                                                               | 0                             | 0                         |
| 2                                                                                               | 0                             | 0                         |
| 3                                                                                               | 6                             | 11.5                      |
| 4                                                                                               | 4                             | 7.7                       |
| 5                                                                                               | 42                            | 80.8                      |

| <b>Do you have any comments or suggestions<br/>(including activities or initiatives you think would be<br/>useful for the future)?</b> | <b>Frequency<br/>(N = 52)</b> | <b>Percentage<br/>(%)</b> |
|----------------------------------------------------------------------------------------------------------------------------------------|-------------------------------|---------------------------|
| More awareness at the grass root levels e.g. tv shows,<br>VHTs, social media                                                           | 40                            | 76.9                      |
| More support from government should be sought                                                                                          | 5                             | 9.6                       |
| More duration for workshop and frequency                                                                                               | 6                             | 11.5                      |
| More support supervision in health facilities                                                                                          | 1                             | 1.9                       |

\*Number of LMIC healthcare staff able to demonstrate how to practice their new knowledge

\*\* Number of LMIC healthcare staff trained and tested demonstrating improved knowledge after training in IPC [Mandatory]

\*\*\* Number of LMIC healthcare staff trained and tested demonstrating improved knowledge after training in AMS principles, antimicrobial prescribing, and consumption surveillance [Mandatory]
