# Supplementary material
Source: MDPI journal article supplement (https://www.mdpi.com/2673-9992/15/1/7)
Supplement: s1 [file s1]

Archive with 3 entries (3 files):
- Figure S1 Poster presentation for Scaling-up interventions for strengthening AMS using a One Health approach in Wakiso district_Final.odp
- File S1.HEALTH_PRACTITIONERS_ PRE_AND_POST_ASSESSMENT_REPORT_AFTER TRAINING_ON_AMR_AMS_IPC_final.pdf
- File S2.Community_Health_Workers_Pre and Post Assesment after training on AMS_AMR_IPC_final.pdf
