# Supplementary material
Source: MDPI journal article supplement (https://www.mdpi.com/2673-9992/15/1/7)
Supplement: s1 [file s1 › Figure S1 Poster presentation for Scaling-up interventions for strengthening AMS using a One Health approach in Wakiso district_Final.odp]

## Slide: Slide2


Training of community health workers, human and animal health practitioners on AMR / AMS / IPC
Mentorship of lower-level health facilities on AMS
Training of pharmacy staff and conducting global point prevalence surveys at ERRH
Workshops for the medicines and therapeutics committee and laboratory workers at ERRH on AMS
Expansion of the communities of practice on AMS for both students and practitioners

The partnership between Nottingham Trent University, Makerere University, Buckinghamshire Healthcare NHS Trust, and Entebbe Regional Referral Hospital (ERRH) has been promoting Antimicrobial Stewardship (AMS) in Wakiso District since 2019. We used a One Health approach with a focus on capacity building, stakeholder engagement, and knowledge exchange. 
Project overview
Future plans
Project impacts

“We now involve AMS in all our health education sessions. After the mentorship, we developed an AMS work plan, AMS committee, AMS focal person, and  adverse drug reaction reporting. Some interventions are feasible and sustainable.”
Health officer in charge of a lower-level health facility
A quote from a health worker
Project activities
152 community health workers (CHWs) trained

52 human and animal health practitioners (HPs) trained

540 health professionals and 250 students reached in the communities of practice

5 lower-level health facilities mentored

Grace Biyinzika Lubega1*, David Musoke1, Suzan Nakalawa1, Claire Brandish2, Bee Yean Ng2, Filimin Niyongabo1, Freddy Eric Kitutu3, Jagdeep Gheer2, Jody Winter4, Michael Brown Obeng5 Kate Russell-Hobbs2, Lawrence Mugisha6, and Linda Gibson5 

1.Makerere University, School of Public Health, Uganda; 2.Buckinghamshire Healthcare, NHS Trust, UK; 3.Makerere University, School of Health Sciences, Uganda; 4.Nottingham Trent University, School of Science and Technology, UK; 5.Nottingham Trent University, School of Social Sciences,UK; .Makerere University, School of Veterinary Medicine and Animal Resources; 

Engage other districts across the country
Reach more health workers, community pharmacies and communities
Include more animal health practitioners
Carryout further project dissemination
Seek more funding to scale up AMS interventions
Project pictorial
